# Supplementary material for: Searching for Genomic Signatures of Probiotic Potential in Novel Saccharomyces Cerevisiae Strains: Comparative Analysis Against S288C and Saccharomyces cerevisiae var. boulardii
Source: Research Square preprint supplement (doi:10.21203/rs.3.rs-8861815/v1), 2026-02-24

### Additional file 3 – uncropped gel images

#### 1. Raw uncropped electrophoresis gel

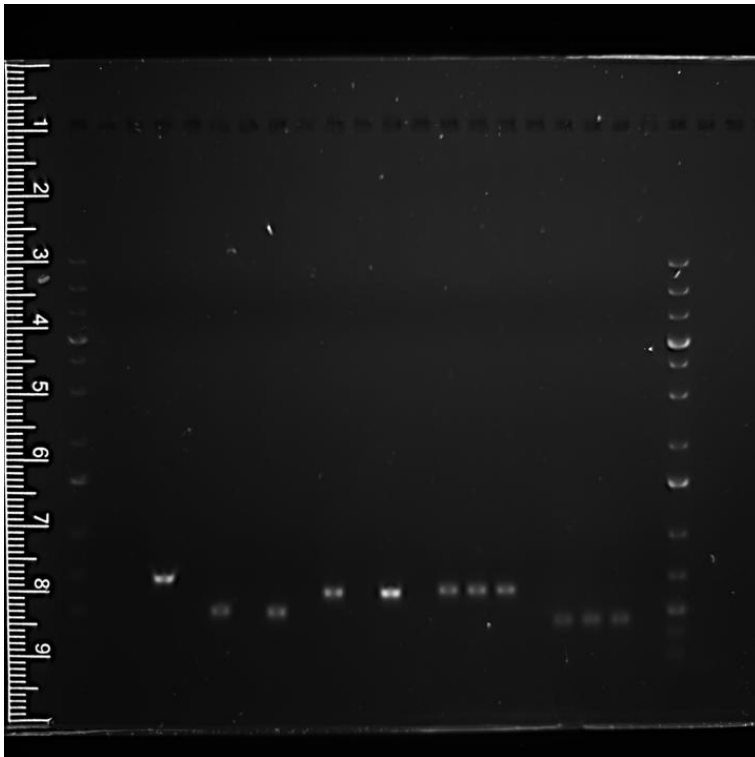

#### 2. Annotated uncropped electrophoresis gel

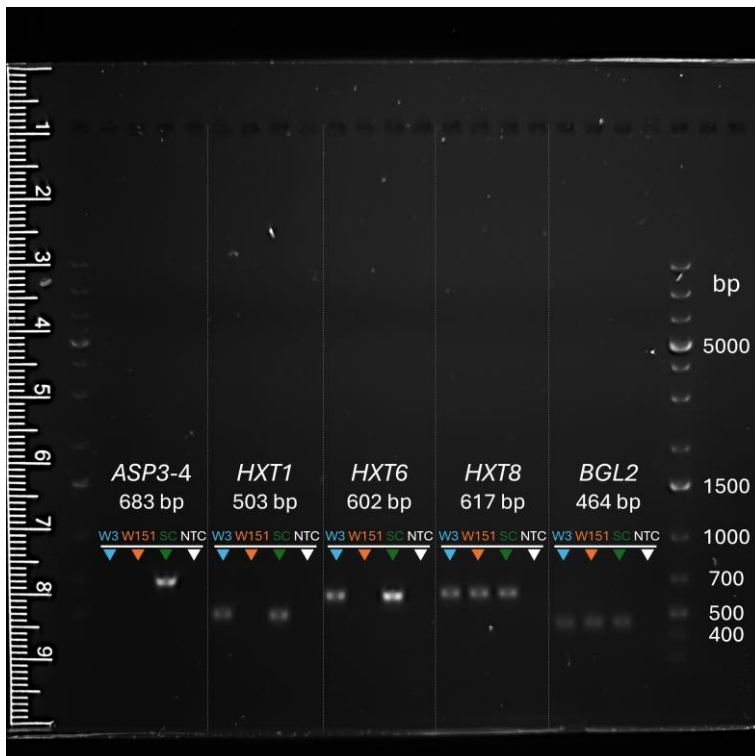

Supplement: Supplementary file 1 [file 5b82d77625c4eee80a2cb639.pdf]
